# Supplementary material
Source: PubMed Central journal article supplement (PMC3396495)
Supplement: 1202194109_pnas.201202194SI.pdf [file 1202194109_pnas.201202194SI.pdf]

# Supporting Information

Zhang et al. 10.1073/pnas.1202194109

## SI Discussion

Although carbachol activated the M1 receptor/Gq/PLC pathway, leading to the hydrolysis of PI(4,5)P<sub>2</sub> and activation of TRPC6, it failed to stimulate TRPML1 activity. In contrast, the breakdown of PI(4,5)P<sub>2</sub> by direct activation of 5-phosphatase was sufficient to activate TRPML1. One potential explanation for this discrepancy is that the affinity of ion channels determines their sensitivity to PI(4,5)P<sub>2</sub> (1). The insensitivity of TRPML1 to M1 receptor activation might reflect the channel's high affinity to PI(4,5)P<sub>2</sub> (IC<sub>50</sub> = 0.2 μM). Although we observed a rapid carbachol-induced translocation of GFP-PLCδ1-PH, a commonly used PI(4,5)P<sub>2</sub> probe with a K<sub>d</sub> of 1.7 μM (2),

it remains unknown whether M1 receptor activation could sufficiently deplete the PI(4,5)P<sub>2</sub> level to modulate TRPML1. Moreover, activation of TRPML1 by GTP-γ-S, but not M1 receptor activation, could potentially be explained by a "receptor-specific phosphoinositide signaling" theory that highlights the importance of a local PI(4,5)P<sub>2</sub> pool in regulating the channels only adjacent to the receptors (3). Finally, the insensitivity of TRPML1 to M1 receptor/PLC activation could also be explained by the fact that receptor stimulation might activate other signaling pathways such as diacylglycerol, inositol triphosphate, Ca<sup>2+</sup>, and PKC, concurrently to nullify the effect of PI(4,5)P<sub>2</sub> depletion on TRPML1 activation.

1. Suh BC, Hille B (2008) PIP<sub>2</sub> is a necessary cofactor for ion channel function: How and why? *Annu Rev Biophys* 37:175–195.
2. Lemmon MA, Ferguson KM, O'Brien R, Sigler PB, Schlessinger J (1995) Specific and high-affinity binding of inositol phosphates to an isolated pleckstrin homology domain. *Proc Natl Acad Sci USA* 92:10472–10476.

3. Gamper N, Shapiro MS (2007) Regulation of ion transport proteins by membrane phosphoinositides. *Nat Rev Neurosci* 8:921–934.

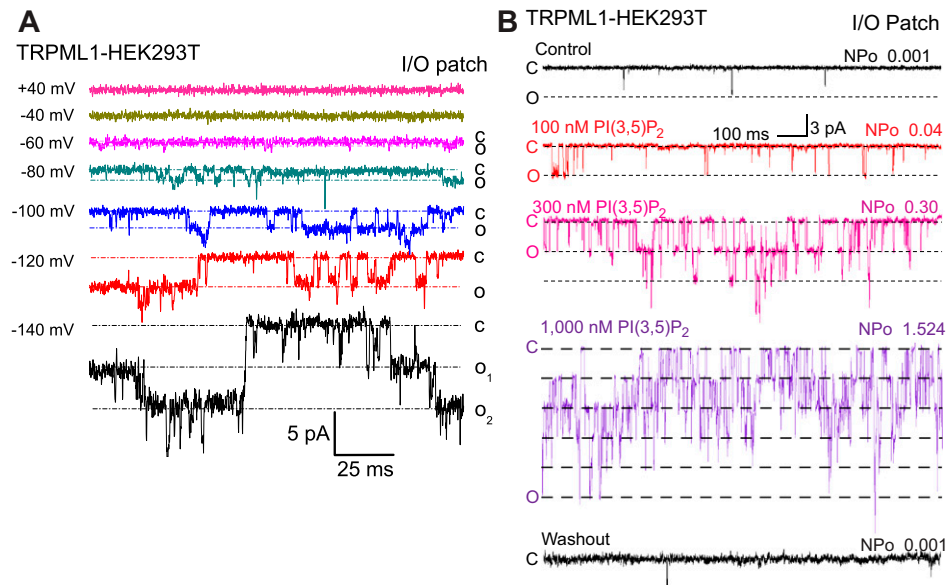

**Fig. S1.** Single-channel currents in an I/O patch excised from a TRPML1-expressing HEK293T cell. (A) Single-channel openings were elicited using a voltage step protocol from  $-140$  mV to  $+80$  mV (HP = 0 mV). At negative, but not positive potentials, channel openings were frequently observed. C, closed state; O, open state. (B) PI(3,5)P<sub>2</sub> activates single channel TRPML1 currents at the plasma membrane (PM) in a dose-dependent manner. The PI(3,5)P<sub>2</sub> effect was examined in an I/O patch excised from TRPML1-GFP-expressing HEK293T cells.

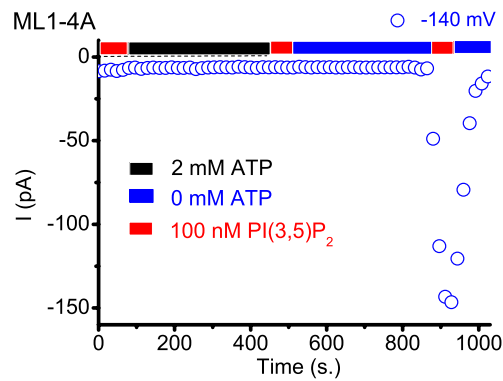

**Fig. 52.** Mg-ATP prevents run-up of TRPML1 currents in I/O patches. In an I/O patch, bath application of 2 mM Mg-ATP for 6 min prevented run-up of ML1-4A. Upon removal of Mg-ATP for 6 min,  $I_{ML1-4A}$  was activated by 100 nM PI(3,5)P<sub>2</sub>.

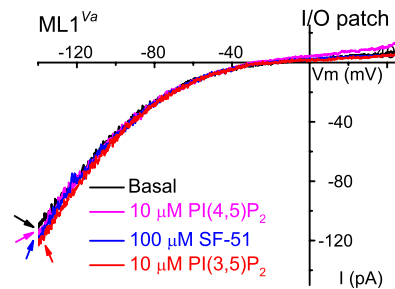

**Fig. 53.** Insensitivity of TRPML1<sup>Va</sup> to PI(4,5)P<sub>2</sub>. Large basal  $I_{ML1-Va}$  was detected in an I/O patch excised from ML1<sup>Va</sup>-expressing cells. PI(4,5)P<sub>2</sub> (10 μM) failed to inhibit  $I_{ML1-Va}$ .

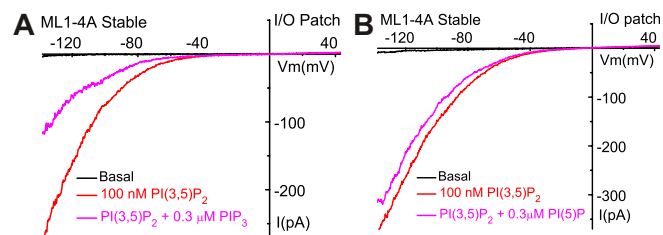

**Fig. 54.** Effects of PI(3,4,5)P<sub>3</sub> and PI(5)P on  $I_{ML1-4A}$ . (A) Inhibition PI(3,5)P<sub>2</sub>-activated  $I_{ML1-4A}$  by 300 nM PI(3,4,5)P<sub>3</sub> in an I/O patch excised from ML1-4A stable cells. (B) Lack of an effect of PI(5)P (300 nM) on PI(3,5)P<sub>2</sub>-activated  $I_{ML1-4A}$ .

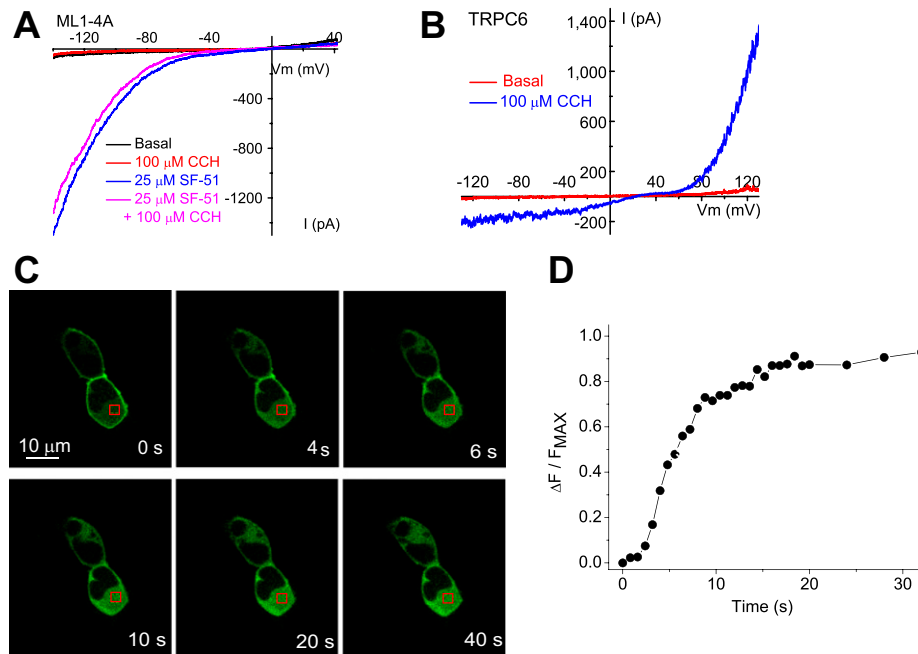

**Fig. 55.** Receptor-mediated activation of PLC induces PI(4,5)P<sub>2</sub> hydrolysis but fails to activate TRPML1. (A) Activation of PLC-coupled M1 receptors had no effect on  $I_{ML1-4A}$ . Carbachol (CCH; 100  $\mu$ M) was used to activate the Gq/PLC pathway in HM1 cells. (B) Whole-cell TRPC6 currents were activated by CCH (100  $\mu$ M). (C and D) CCH-induced hydrolysis of PI(4,5)P<sub>2</sub> detected using a PI(4,5)P<sub>2</sub> probe. (C) CCH (100  $\mu$ M) induced a translocation of GFP-PLC $\delta$ 1-PH from the plasma membrane to the cytosol. Images shown were taken 0, 4, 6, 10, 20, and 40 s after CCH application. Red boxes indicate cytosolic regions where fluorescence intensity (F) was measured. (D) Time course of GFP-PLC $\delta$ 1-PH translocation. Changes in average fluorescence intensity ( $\Delta F = F - F_{\text{basal}}$ ) are normalized to maximum change of fluorescence intensity ( $F_{\text{max}}$ ) and plotted with time. Data were analyzed with ImageJ software (National Institutes of Health).

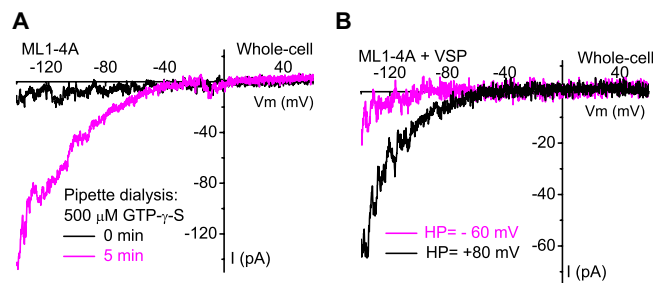

**Fig. 56.** GTP- $\gamma$ -S and depolarization-activated Ci-VSP evoke whole-cell TRPML1 currents. (A) In an HM1 cell overexpressing TRPML1-4A, small whole-cell  $I_{ML1-4A}$  developed gradually upon pipette dialysis of GTP- $\gamma$ -S (500  $\mu$ M) for 5 min. (B) Depolarization-activated Ci-VSP increases basal  $I_{ML1-4A}$ . Representative traces of whole-cell currents in Ci-VSP-transfected ML1-4A stable cells before (HP = -60 mV) and 8 min after depolarization (HP = +80 mV).  $I_{ML1-4A}$  was elicited by voltage ramps (from -140 mV to +100 mV; 100-ms duration).

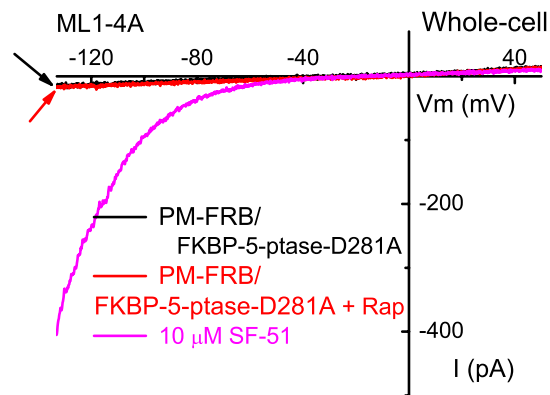

**Fig. S7.** PM-translocation of inactive mutant FKBP-5-phosphatase fails to activate whole-cell TRPML1 currents. No detectable  $I_{ML1-4A}$  was observed with or without Rapamycin ( $0.5 \mu\text{M}$ ) application in ML1-4A-expressing HEK293 stable cells transfected with inactive mutant (D281A) of FKBP-5-phosphatase (FKBP-5-ptase-D281A) together with PM-FRB, which contains a signal for the PM localization. The dimerization of FRB and FKBP induced by rapamycin ( $0.5 \mu\text{M}$  for 10 min) led to translocation of 5-phosphatase from the cytosol to the PM.  $I_{ML1-4A}$  was readily activated by SF-51 in the same cell.

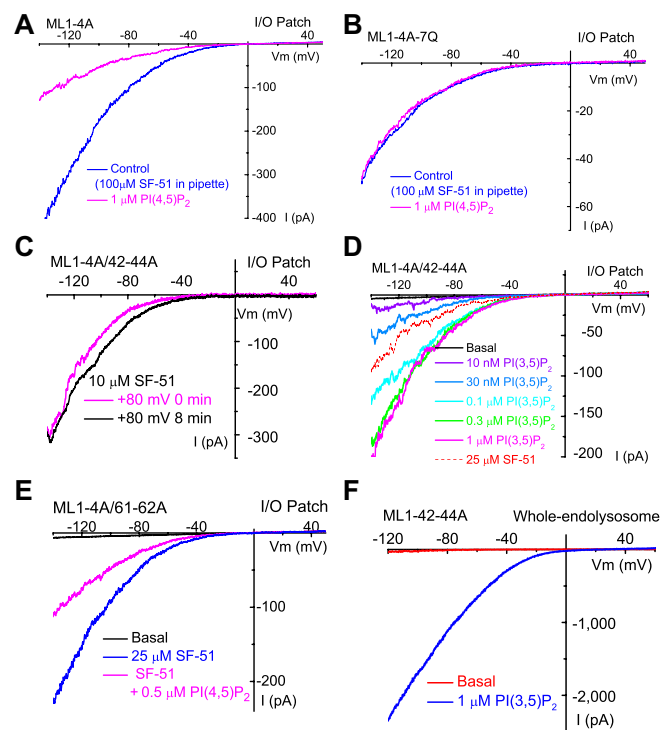

**Fig. S8.** Mutational analysis of  $\text{PI}(4,5)\text{P}_2$  inhibition and  $\text{PI}(3,5)\text{P}_2$  activation of TRPML1. (A and B)  $\text{PI}(4,5)\text{P}_2$  inhibition is abolished by 7Q mutations in I/O patches. (A) Activation of  $I_{ML1-4A}$  by SF-51 ( $100 \mu\text{M}$ ; included in pipette solution) was significantly inhibited by bath application of  $\text{PI}(4,5)\text{P}_2$  ( $1 \mu\text{M}$ ). (B) Activation of  $I_{ML1-4A-7Q}$  by SF-51 ( $100 \mu\text{M}$ ; included in pipette solution) was insensitive to  $\text{PI}(4,5)\text{P}_2$  ( $1 \mu\text{M}$ ). (C) Triple mutations in the  $\text{PIP}_2$ -interacting domain abolish the activation effect of Ci-VSP. Activation of Ci-VSP by depolarization (HP =  $+80 \text{ mV}$ ) failed to potentiate the SF-51 ( $10 \mu\text{M}$ )-activated  $I_{ML1-4A/42-44A}$ . (D) Dose-dependent activation of ML1-4A/42-44A by  $\text{PI}(3,5)\text{P}_2$ .  $I_{ML1-4A/42-44A}$  was activated by various concentrations of  $\text{PI}(3,5)\text{P}_2$  ( $10 \text{ nM}$ ,  $30 \text{ nM}$ ,  $0.1 \mu\text{M}$ ,  $0.3 \mu\text{M}$ , and  $1 \mu\text{M}$ ). Effect of SF-51 ( $25 \mu\text{M}$ ) is shown for comparison. (E)  $\text{PI}(4,5)\text{P}_2$  sensitivity of R61A/K62A double mutations. Activation of  $I_{ML1-4A/61-62A}$  by SF-51 ( $25 \mu\text{M}$ ) was inhibited by  $\text{PI}(4,5)\text{P}_2$  ( $0.5 \mu\text{M}$ ). (F) Activation of ML1-42-44A by  $\text{PI}(3,5)\text{P}_2$  in the lysosome. Whole-endolysosome  $I_{42-44A}$  was robustly activated by  $\text{PI}(3,5)\text{P}_2$  ( $1 \mu\text{M}$ ).
